# Supplementary material
Source: ML conference proceedings conference paper supplement (https://aclanthology.org/D19-1520)
Supplement: Attachment [file D19-1520.Attachment.pdf]

# Supplementary Material

## A Appendix

### A.1 Corpus Statistics

Table 1 presents the train/dev/test splits used for the NER model training, along with the total number of tokens present in the training data.

| Source | Dataset    | Train / Dev / Test<br># Sentences | Total Tokens<br>in Train |
|--------|------------|-----------------------------------|--------------------------|
| LDC    | Hindi      | 2570 / 809 / 1592                 | 48604                    |
|        | Indonesian | 3181 / 1001 / 1991                | 55270                    |
|        | Spanish    | 1398 / 465 / 928                  | 31799                    |
| CoNLL  | Dutch      | 13274 / 2307 / 4227               | 200059                   |
|        | German     | 12067 / 2849 / 2984               | 206846                   |
|        | Spanish    | 8357 / 1915 / 1517                | 264715                   |

Table 1: Corpus Statistics.

### A.2 NER Model Hyperparameters

For each language, we train the model with 1000 pre-trained GloVe (Pennington et al., 2014) word embeddings trained on Wikipedia and the monolingual text extracted from the train set. We use hidden size of 200 for each direction of the LSTM and a dropout of 0.5. SGD is used as the optimizer with a learning rate of 0.015. During fine-tuning, the NER model is first trained on the transferred data with the above settings. For the first active learning run, the model is fine-tuned on the target language with a lower learning rate of  $1e-5$  and for each subsequent run, this rate is increased to 0.015.

### A.3 Training Schemes

The results for comparing the different training schemes for Spanish CoNLL, German CoNLL and Indonesian can be seen in Figure 1.

### A.4 Variance Analysis

Figure 2 shows the 95% confidence intervals of the NER models comparing the different active learn-

ing strategies for the CoNLL datasets using the bootstrap re-sampling method.

| Dataset          | Tokens | ETAL              | SAL               | RAND              | CFEAL             |
|------------------|--------|-------------------|-------------------|-------------------|-------------------|
| Dutch<br>CoNLL   | 200    | <b>69.4 ± 1.6</b> | <b>69.6 ± 1.6</b> | <b>69.4 ± 1.6</b> | <b>69.4 ± 1.6</b> |
|                  | 600    | 74.8 ± 1.6        | 69.4 ± 1.6        | 67.2 ± 2.1        | 66.3 ± 1.8        |
|                  | 1200   | 77.0 ± 1.5        | 69.6 ± 1.7        | 74.0 ± 0.0        | 68.7 ± 1.8        |
| German<br>CoNLL  | 200    | <b>59.3 ± 1.7</b> | <b>57.4 ± 1.9</b> | 55.2 ± 2.1        | 54.7 ± 2.1        |
|                  | 600    | 62.9 ± 1.7        | 58.7 ± 1.8        | 58.1 ± 2.0        | 57.2 ± 1.8        |
|                  | 1200   | 64.7 ± 1.7        | 58.7 ± 1.8        | 60.7 ± 1.8        | 60.1 ± 1.7        |
| Spanish<br>CoNLL | 200    | <b>69.7 ± 1.7</b> | 65.8 ± 1.8        | <b>69.5 ± 1.6</b> | 65.3 ± 1.7        |
|                  | 600    | 75.3 ± 1.8        | 66.3 ± 1.8        | 73.3 ± 1.8        | 67.8 ± 1.7        |
|                  | 1200   | 77.1 ± 1.7        | 65.7 ± 1.8        | 73.2 ± 1.8        | 70.2 ± 1.7        |

Table 2: Variance analysis for significance testing of different active learning systems using paired bootstrap resampling.  $\pm$  denotes the 95% confidence intervals. Systems which are not statistically significant than the best system ETAL are highlighted in bold.

### A.5 Comprehensive Results

Table 3, 4, 5, 5, 7, 8 compares the number of entities present in the data selected by ETAL, CFEAL and SAL across all the datasets.

Tables 9, 10, 11, 12, 13, 14 show the tabulated results for the NER models trained with different active learning strategies for Hindi, Indonesian, German, Spanish and Dutch datasets.

As mentioned in the ablation study which evaluates the effectiveness of PARTIAL-CRF OVER FULL-CRF, we find that FULL-CRF significantly hurts the recall. Table 15, 16, 17, 18, 19 documents the results of the recall scores across the two settings for Hindi, Indonesian, Spanish-LDC, Spanish-CoNLL, German and Dutch respectively.

## References

Jeffrey Pennington, Richard Socher, and Christopher Manning. 2014. Glove: Global vectors for word representation. In *Proceedings of the 2014 conference on empirical methods in natural language processing (EMNLP)*, pages 1532–1543.

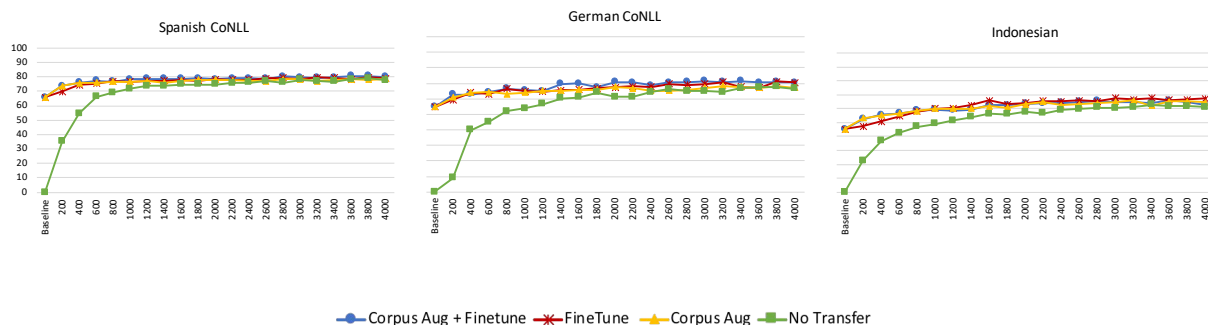

Figure 1: Comparison of the NER performance trained with different schemes for the ETAL strategy.

| Method                  | 1   | 2   | 3   | 4   | 5   | 6   | 7   | 8   | 9   | 10  | 11   | 12   | 13   | 14   | 15   | 16   | 17   | 18   | 19   | 20   |
|-------------------------|-----|-----|-----|-----|-----|-----|-----|-----|-----|-----|------|------|------|------|------|------|------|------|------|------|
| ETAL + PARTIAL-CRF + CT | 115 | 192 | 281 | 379 | 482 | 580 | 675 | 769 | 854 | 934 | 994  | 1083 | 1135 | 1158 | 1171 | 1178 | 1178 | 1179 | 1180 | 1180 |
| CFEAL+ PARTIAL-CRF + CT | 88  | 207 | 298 | 397 | 506 | 608 | 698 | 793 | 877 | 978 | 1047 | 1078 | 1104 | 1111 | 1113 | 1119 | 1123 | 1131 | 1132 | 1137 |
| SAL+ FULL-CRF + CT      | 21  | 42  | 45  | 52  | 60  | 70  | 88  | 95  | 111 | 126 | 133  | 150  | 158  | 174  | 184  | 195  | 210  | 227  | 235  | 246  |

Table 3: Comparing number of entities across ETAL, SAL and CFEAL for the Hindi LDC dataset.

| Method                  | 1  | 2   | 3   | 4   | 5   | 6   | 7   | 8   | 9   | 10   | 11   | 12   | 13   | 14   | 15   | 16   | 17   | 18   | 19   | 20   |
|-------------------------|----|-----|-----|-----|-----|-----|-----|-----|-----|------|------|------|------|------|------|------|------|------|------|------|
| ETAL + PARTIAL-CRF + CT | 87 | 186 | 303 | 413 | 525 | 647 | 741 | 849 | 949 | 1056 | 1138 | 1221 | 1303 | 1360 | 1450 | 1484 | 1511 | 1525 | 1535 | 1536 |
| CFEAL+ PARTIAL-CRF + CT | 86 | 192 | 280 | 371 | 449 | 517 | 601 | 666 | 726 | 793  | 847  | 911  | 973  | 1021 | 1069 | 1125 | 1186 | 1244 | 1269 | 1329 |
| SAL+ FULL-CRF + CT      | 7  | 16  | 28  | 39  | 46  | 50  | 63  | 79  | 90  | 106  | 132  | 143  | 158  | 161  | 168  | 187  | 209  | 225  | 231  | 246  |

Table 4: Comparing number of entities across ETAL, SAL and CFEAL for the Indonesian LDC dataset.

| Method                  | 1  | 2   | 3   | 4   | 5   | 6   | 7   | 8   | 9   | 10  | 11  | 12  |
|-------------------------|----|-----|-----|-----|-----|-----|-----|-----|-----|-----|-----|-----|
| ETAL + PARTIAL-CRF + CT | 84 | 187 | 280 | 391 | 492 | 534 | 585 | 610 | 617 | 619 | 620 | 621 |
| CFEAL+ PARTIAL-CRF + CT | 79 | 238 | 408 | 530 | 628 | 709 | 777 | 794 | 800 | 801 | 804 | 805 |
| SAL+ FULL-CRF + CT      | 5  | 10  | 15  | 18  | 20  | 25  | 30  | 46  | 55  | 66  | 80  | 94  |

Table 5: Comparing number of entities across ETAL, SAL and CFEAL for the Spanish LDC dataset.

| Method                  | 1   | 2   | 3   | 4   | 5   | 6   | 7   | 8    | 9    | 10   | 11   | 12   | 13   | 14   | 15   | 16   | 17   | 18   | 19   | 20   |
|-------------------------|-----|-----|-----|-----|-----|-----|-----|------|------|------|------|------|------|------|------|------|------|------|------|------|
| ETAL + PARTIAL-CRF + CT | 152 | 298 | 427 | 562 | 693 | 823 | 950 | 1094 | 1234 | 1381 | 1503 | 1636 | 1753 | 1882 | 2010 | 2130 | 2257 | 2384 | 2522 | 2674 |
| CFEAL+ PARTIAL-CRF + CT | 64  | 128 | 184 | 236 | 293 | 343 | 389 | 440  | 492  | 543  | 593  | 642  | 682  | 729  | 767  | 803  | 873  | 945  | 1021 | 1095 |
| SAL+ FULL-CRF + CT      | 27  | 44  | 66  | 79  | 88  | 102 | 117 | 129  | 132  | 142  | 154  | 172  | 180  | 196  | 223  | 232  | 240  | 252  | 263  | 279  |

Table 6: Comparing number of entities across ETAL, SAL and CFEAL for the Spanish CoNLL dataset.

| Method                  | 1   | 2   | 3   | 4   | 5   | 6   | 7   | 8    | 9    | 10   | 11   | 12   | 13   | 14   | 15   | 16   | 17   | 18   | 19   | 20   |
|-------------------------|-----|-----|-----|-----|-----|-----|-----|------|------|------|------|------|------|------|------|------|------|------|------|------|
| ETAL + PARTIAL-CRF + CT | 154 | 264 | 386 | 513 | 664 | 775 | 883 | 1016 | 1153 | 1275 | 1365 | 1490 | 1588 | 1730 | 1827 | 1954 | 2064 | 2121 | 2211 | 2329 |
| CFEAL+ PARTIAL-CRF + CT | 80  | 158 | 217 | 285 | 365 | 424 | 490 | 566  | 640  | 704  | 772  | 847  | 941  | 1008 | 1084 | 1146 | 1220 | 1285 | 1358 | 1423 |
| SAL+ FULL-CRF + CT      | 22  | 68  | 74  | 81  | 93  | 101 | 112 | 123  | 135  | 148  | 166  | 175  | 188  | 198  | 205  | 213  | 224  | 230  | 239  | 243  |

Table 7: Comparing number of entities across ETAL, SAL and CFEAL for the German CoNLL dataset.

| Method                  | 1   | 2   | 3   | 4   | 5   | 6   | 7    | 8    | 9    | 10   | 11   | 12   | 13   | 14   | 15   | 16   | 17   | 18   | 19   | 20   |
|-------------------------|-----|-----|-----|-----|-----|-----|------|------|------|------|------|------|------|------|------|------|------|------|------|------|
| ETAL + PARTIAL-CRF + CT | 166 | 311 | 448 | 584 | 730 | 862 | 1008 | 1119 | 1227 | 1356 | 1466 | 1592 | 1708 | 1810 | 1931 | 2041 | 2152 | 2256 | 2376 | 2496 |
| CFEAL+ PARTIAL-CRF + CT | 89  | 172 | 253 | 342 | 420 | 494 | 581  | 672  | 767  | 855  | 942  | 1020 | 1102 | 1181 | 1259 | 1341 | 1416 | 1505 | 1583 | 1660 |
| SAL+ FULL-CRF + CT      | 27  | 48  | 69  | 83  | 96  | 107 | 141  | 151  | 160  | 163  | 171  | 188  | 204  | 226  | 237  | 252  | 262  | 275  | 282  | 283  |

Table 8: Comparing number of entities across ETAL, SAL and CFEAL for the Dutch CoNLL dataset.



| Method                  | 0    | 1           | 2           | 3           | 4           | 5           | 6           | 7           | 8           | 9           | 10          | 11          | 12          | 13          | 14          | 15          | 16          | 17          | 18          | 19          | 20          |
|-------------------------|------|-------------|-------------|-------------|-------------|-------------|-------------|-------------|-------------|-------------|-------------|-------------|-------------|-------------|-------------|-------------|-------------|-------------|-------------|-------------|-------------|
| ETAL + PARTIAL-CRF + CT | 38.6 | <b>51.4</b> | <b>56.8</b> | <b>59.7</b> | <b>60.4</b> | <b>61.8</b> | <b>63.2</b> | <b>64.1</b> | <b>65.3</b> | <b>66.8</b> | <b>68.7</b> | <b>65.5</b> | <b>66.9</b> | <b>67.6</b> | <b>69.8</b> | <b>69.9</b> | <b>71.1</b> | <b>68.1</b> | <b>68.5</b> | <b>68.4</b> | <b>70.7</b> |
| ETAL + FULL-CRF + CT    | 38.6 | 45.8        | 46.0        | 48.3        | 50.6        | 51.1        | 52.6        | 53.0        | 54.2        | 55.6        | 55.9        | 56.4        | 56.4        | 54.6        | 54.9        | 56.6        | 56.2        | 55.1        | 57.3        | 57.5        | 55.7        |

Table 15: Comparing recall scores for evaluating the effectiveness of PARTIAL-CRF over FULLCRF for the Hindi LDC dataset.

| Method                  | 0    | 1           | 2           | 3           | 4           | 5           | 6           | 7           | 8           | 9           | 10          | 11          | 12          | 13          | 14          | 15          | 16          | 17          | 18          | 19          | 20          |
|-------------------------|------|-------------|-------------|-------------|-------------|-------------|-------------|-------------|-------------|-------------|-------------|-------------|-------------|-------------|-------------|-------------|-------------|-------------|-------------|-------------|-------------|
| ETAL + PARTIAL-CRF + CT | 51.0 | 47.1        | 48.3        | 52.1        | 55.0        | <b>57.6</b> | <b>61.3</b> | <b>59.8</b> | <b>64.3</b> | <b>61.1</b> | <b>63.2</b> | <b>64.0</b> | <b>64.2</b> | <b>64.3</b> | 62.8        | <b>66.6</b> | <b>64.5</b> | <b>64.6</b> | <b>63.0</b> | <b>65.3</b> | <b>64.2</b> |
| ETAL + FULL-CRF + CT    | 51.0 | <b>51.3</b> | <b>55.3</b> | <b>54.6</b> | <b>56.6</b> | 55.4        | 56.2        | 58.6        | 58.9        | 60.5        | 60.8        | 61.1        | 61.2        | 60.7        | <b>63.0</b> | 62.5        | 60.1        | 58.9        | 62.5        | 62.7        | 62.3        |

Table 16: Comparing recall scores for evaluating the effectiveness of PARTIAL-CRF over FULLCRF for the Indonesian LDC dataset.

| Method                  | 0    | 1           | 2           | 3           | 4           | 5           | 6           | 7           | 8           | 9           | 10          | 11          | 12          |
|-------------------------|------|-------------|-------------|-------------|-------------|-------------|-------------|-------------|-------------|-------------|-------------|-------------|-------------|
| ETAL + PARTIAL-CRF + CT | 57.4 | <b>59.5</b> | 58.5        | 57.5        | <b>63.9</b> | <b>72.2</b> | <b>75.1</b> | <b>76.0</b> | <b>76.0</b> | <b>75.5</b> | <b>75.6</b> | <b>73.7</b> | <b>74.6</b> |
| ETAL + FULL-CRF + CT    | 57.4 | 59.4        | <b>61.7</b> | <b>60.6</b> | 61.5        | 61.9        | 63.1        | 62.1        | 62.1        | 61.9        | 63.3        | 63.0        | 61.9        |

Table 17: Comparing recall scores for evaluating the effectiveness of PARTIAL-CRF over FULLCRF for the Spanish LDC dataset.

| Method                  | 0    | 1           | 2           | 3           | 4           | 5           | 6           | 7           | 8           | 9           | 10          | 11          | 12          | 13          | 14          | 15          | 16          | 17          | 18          | 19          | 20          |
|-------------------------|------|-------------|-------------|-------------|-------------|-------------|-------------|-------------|-------------|-------------|-------------|-------------|-------------|-------------|-------------|-------------|-------------|-------------|-------------|-------------|-------------|
| ETAL + PARTIAL-CRF + CT | 45.7 | <b>58.3</b> | <b>61.6</b> | <b>63.9</b> | <b>63.2</b> | <b>66.0</b> | <b>64.1</b> | <b>64.2</b> | <b>62.8</b> | <b>65.3</b> | <b>67.4</b> | <b>67.8</b> | <b>68.9</b> | <b>68.1</b> | <b>69.4</b> | <b>67.3</b> | <b>68.4</b> | 63.5        | 63.1        | <b>69.5</b> | 65.5        |
| ETAL + FULL-CRF + CT    | 45.7 | 52.2        | 56.6        | 60.2        | 61.3        | 61.3        | 61.1        | 62.6        | 61.1        | 61.0        | 61.2        | 62.8        | 63.1        | 63.4        | 63.8        | 64.4        | 65.6        | <b>64.2</b> | <b>64.8</b> | 67.2        | <b>65.5</b> |

Table 18: Comparing recall scores for evaluating the effectiveness of PARTIAL-CRF over FULLCRF for the German CoNLL dataset.

| Method                  | 0    | 1           | 2           | 3           | 4           | 5           | 6           | 7           | 8           | 9           | 10          | 11          | 12          | 13          | 14          | 15          | 16          | 17          | 18          | 19          | 20          |
|-------------------------|------|-------------|-------------|-------------|-------------|-------------|-------------|-------------|-------------|-------------|-------------|-------------|-------------|-------------|-------------|-------------|-------------|-------------|-------------|-------------|-------------|
| ETAL + PARTIAL-CRF + CT | 65.8 | 66.4        | <b>70.6</b> | <b>73.9</b> | <b>75.1</b> | <b>75.6</b> | <b>76.2</b> | <b>79.4</b> | <b>78.7</b> | <b>78.6</b> | <b>79.1</b> | <b>78.7</b> | <b>79.7</b> | <b>79.0</b> | <b>80.3</b> | <b>80.5</b> | <b>79.7</b> | <b>81.1</b> | <b>81.2</b> | <b>78.9</b> | <b>81.7</b> |
| ETAL + FULL-CRF + CT    | 65.8 | <b>66.9</b> | 66.1        | 68.8        | 70.9        | 70.8        | 75.5        | 74.1        | 75.4        | 73.6        | 75.6        | 76.5        | 74.9        | 76.1        | 75.3        | 76.5        | 77.0        | 75.1        | 76.9        | 75.1        | 75.5        |

Table 19: Comparing recall scores for evaluating the effectiveness of PARTIAL-CRF over FULLCRF for the Dutch CoNLL dataset.
